# Supplementary material for: Bilirubin and risk of ischemic heart disease in Korea: a two-sample Mendelian randomization study
Source: PubMed Central journal article supplement (PMC6759489; doi:10.4178/epih.e2019034), 2019-07-12
Supplement: epih-41-e2019034-supplementary.pdf [file epih-41-e2019034-supplementary.pdf]

Supplementary Material 1. Flow chart of study population in two-sample Mendelian Randomization

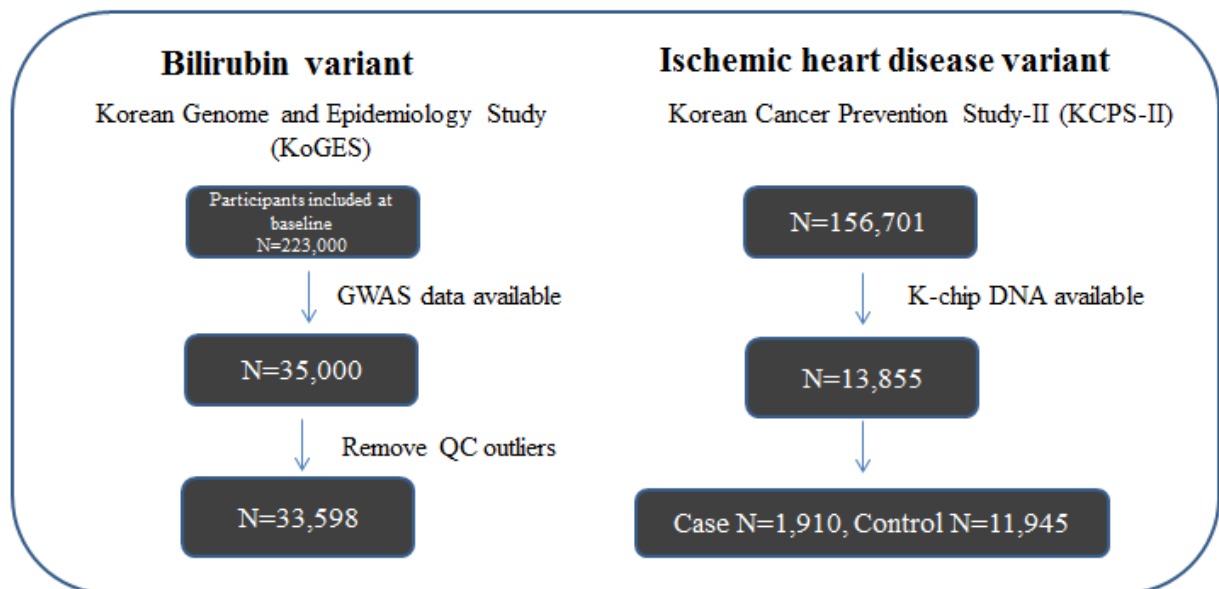

\*KNIH: Korea National Institute of Health

## Supplementary Material 2. Leave-one-out analysis

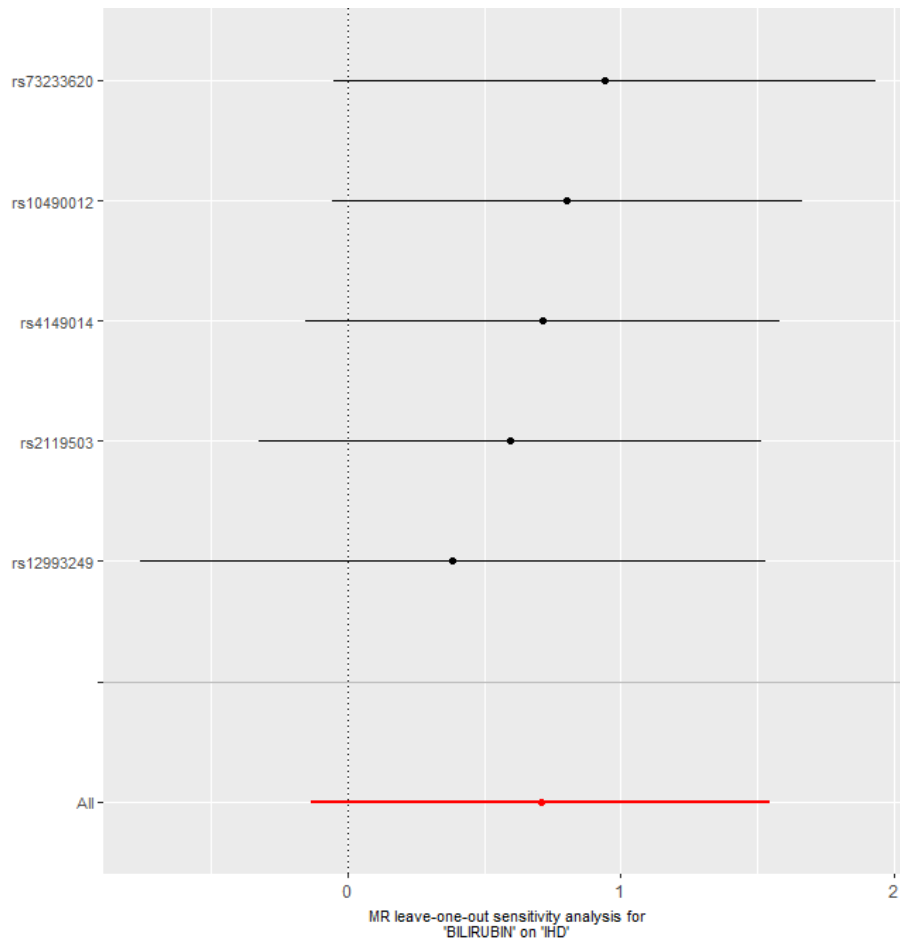

Supplementary Material 3. Radial plot showing no significant outliers

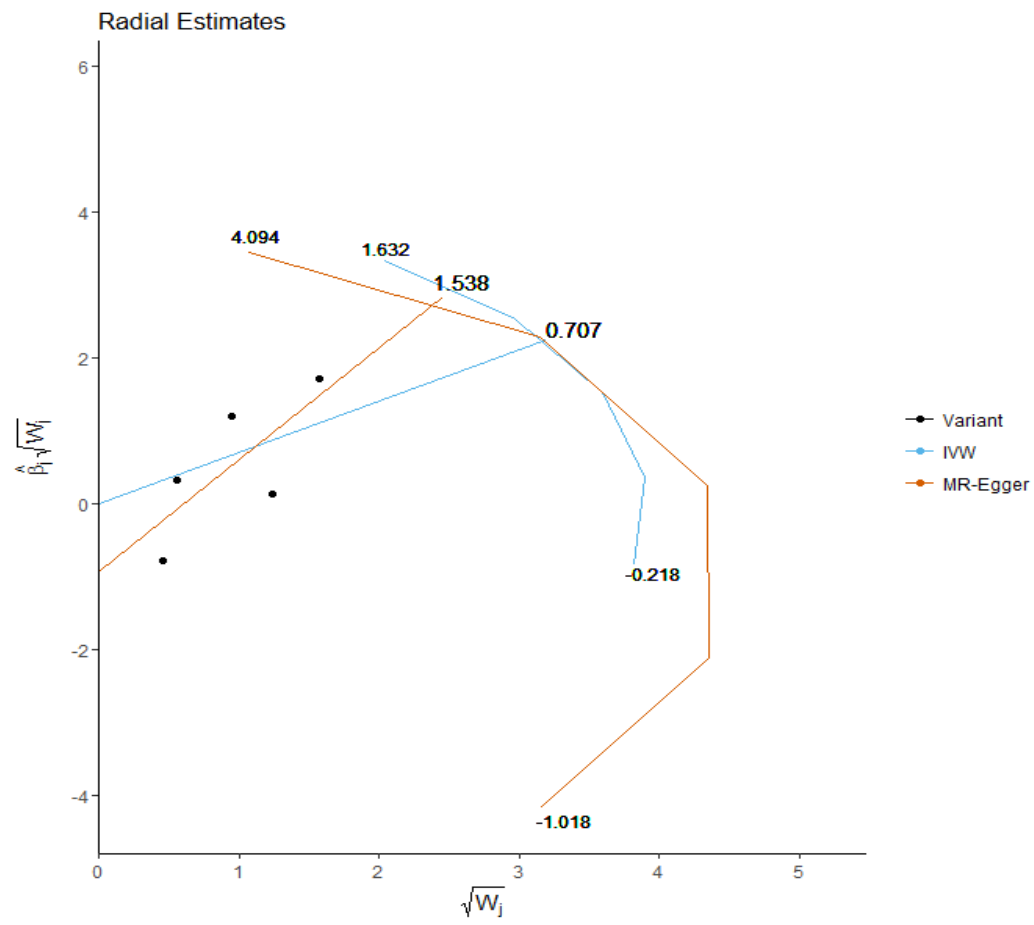

Supplementary Material 4. Association of ischemic heart disease in bilirubin genetic variants based on two-sample Mendelian randomization using SNPs from previously identified from European ancestry

| SNP        | Genes          | Chr | MAF  | Reported GWAS Studies |           | Current study on 2-sample Mendelian randomization analysis (IVW) |                 |
|------------|----------------|-----|------|-----------------------|-----------|------------------------------------------------------------------|-----------------|
|            |                |     |      | <i>p</i> -value       | Reference | Beta ( <i>SE</i> )                                               | <i>p</i> -value |
| rs6742078  | <i>UGT1A1</i>  | 2   | 0.32 | 5E-324                | (1)       |                                                                  |                 |
| rs887829   | <i>UGT1A1</i>  | 2   | 0.32 | 5E-324                | (1),(2)   |                                                                  |                 |
| rs11891311 | <i>UGT1A1</i>  | 2   | 0.35 | 1E-235                | (1),(2)   | 0.49 (0.28)                                                      | 0.0809          |
| rs4149056  | <i>SLCO1B1</i> | 12  | 0.15 | 7E-13                 | (1)       |                                                                  |                 |
| rs2117032  | <i>SLCO1B3</i> | 12  | 0.46 | 3E-14                 | (2)       |                                                                  |                 |

(1) Johnson AD, Kavousi M, Smith AV et al: Genome-wide association meta-analysis for total serum bilirubin levels. *Hum Mol Genet* 2009; 18: 2700–2710.

(2) Sanna S, Busonero F, Maschio A et al: Common variants in the *SLCO1B3* locus are associated with bilirubin levels and unconjugated hyperbilirubinemia. *Hum Mol Genet* 2009; 18: 2711–2718

Abbreviation, GWAS; genome-wide association study. Chr: chromosome, MAF; minor allele frequency, SE; standard error, IVW: inverse variance weighted

Supplementary Material 5. Ethnic differences in allele frequencies of *SLCO1B1* and *SLCO1B3* based on 1000 Genomes reference

|             | <b>rs4149014</b> |            | <b>rs73233620</b> |            |
|-------------|------------------|------------|-------------------|------------|
| Population  | Ref Allele       | Alt Allele | Ref Allele        | Alt Allele |
| African     | 0.940            | 0.060      | 0.775             | 0.225      |
| East Asian  | 0.667            | 0.333      | 0.822             | 0.178      |
| Europe      | 0.981            | 0.019      | 0.975             | 0.025      |
| South Asian | 0.96             | 0.04       | 0.97              | 0.03       |
| American    | 0.97             | 0.03       | 0.95              | 0.05       |

Ref : reference, Alt : alternative
